# Supplementary material for: Hydrochemical Characteristics and Water Quality of Shallow Groundwater in Desert Area of Kunyu City, Southern Margin of Tarim Basin, China
Source: MDPI journal article supplement (doi:10.3390/w15081563), 2023-04-17
Supplement: s1 [file s1]

Archive with 1 entries (1 files):
- water-2300204-supplementary.pdf
