# Supplementary figures and images for: Hydrochemical Characteristics and Water Quality of Shallow Groundwater in Desert Area of Kunyu City, Southern Margin of Tarim Basin, China
Source: MDPI journal article supplement (doi:10.3390/w15081563), 2023-04-17

the Supplementary Materials:

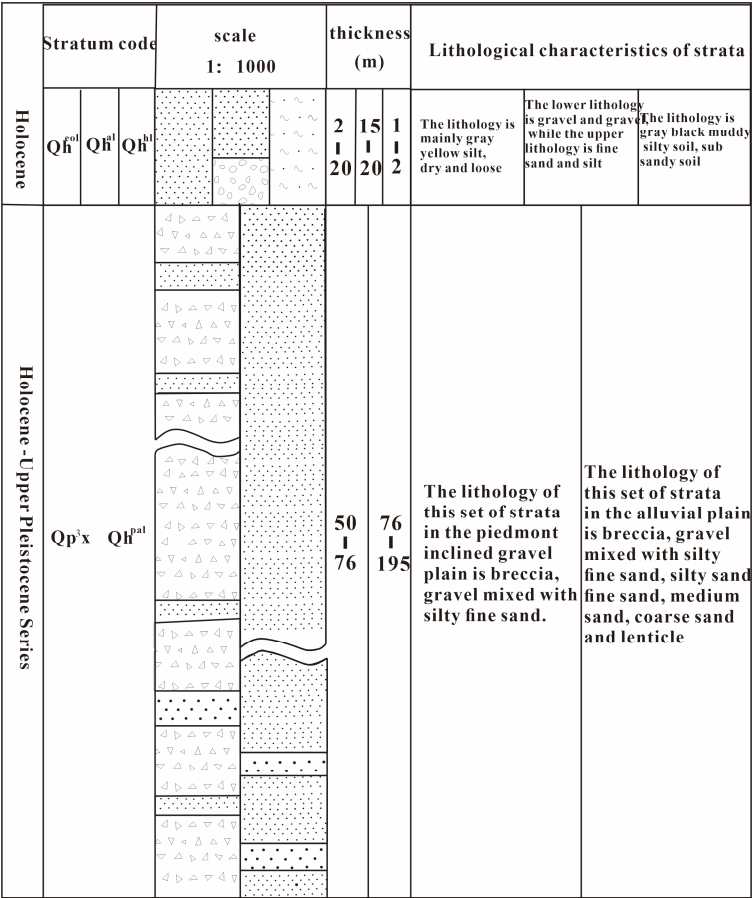

Figures S1. Comprehensive histogram in the study area

Supplement: s1 [file s1 › water-2300204-supplementary.pdf]
